# Supplementary material for: Nuclear spin noise tomography in three dimensions
Source: Copernicus journal article supplement (doi:10.5194/mr-2020-12), 2020-05-27
Supplement: Supplementary file 1 [file supplementary_material.docx]

Coordinate system

Figure S1 shows the coordinate system used for describing the gradient directions and the data processing scheme in the main text.


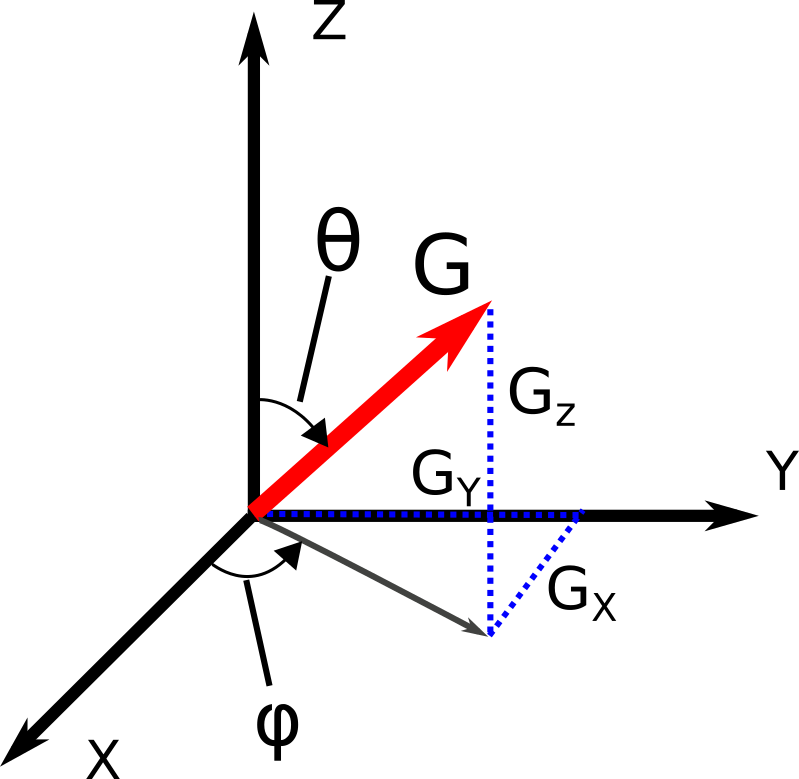


Figure S1: The standard three-dimensional cartesian coordinate system. The red arrow indicates an example gradient G to show the location of the angles. The blue dotted lines mark the cartesian coordinate vector components (Gx, Gy, Gz) of the gradient G.
